# Supplementary material for: Is bilingualism losing its advantage? A bibliometric approach
Source: PubMed Central journal article supplement (PMC5398607; doi:10.1371/journal.pone.0176151), 2017-04-20
Supplement: pone.0176151.s001.pdf [file pone.0176151.s001.pdf]

## Supporting Information

List of the 139 publications (descending order by year of publication) retrieved from the Scopus database included in our analysis. The search could be replicated by following the query and the inclusion/exclusion criteria of publications reported in the Method section of the manuscript. Each publication is identified by title, abbreviated list of authors, year of publication, journal, journal impact factor for the year of publication (Journal Citation Reports), and accumulated cites in June 2016. See the disposition of the information in the example presented below.

| Title               |         | Authors  |       |     |                        |
|---------------------|---------|----------|-------|-----|------------------------|
| Year of publication | Journal | Category | % Sup | JIF | Acc. Cites (June 2016) |

%Sup: percentage of behavioral information supporting the bilingual advantage; Acc.: accumulated.

Note that paper categories are designated as follows: Supporting the bilingual advantage (SBA) = 1; Ambiguous regarding the bilingual advantage (ABA) = 2; Not mentioning the bilingual advantage (NMA) = 3; Challenging the bilingual advantage (CBA) = 4. Studies classified as NMA have no %Sup.

### List of publications

|                                                                                                                                                                                            |                                                 |                     |      |       |   |
|--------------------------------------------------------------------------------------------------------------------------------------------------------------------------------------------|-------------------------------------------------|---------------------|------|-------|---|
| A behavioral and electrophysiological investigation of the effect of bilingualism on lexical ambiguity resolution in young adults                                                          |                                                 | Kousaie et al.      |      |       |   |
| 2015                                                                                                                                                                                       | <i>Frontiers in Human Neuroscience</i>          | 4                   | 0    | 2,986 | 0 |
| Audio-visual object search is changed by bilingual experience                                                                                                                              |                                                 | Chabal et al.       |      |       |   |
| 2015                                                                                                                                                                                       | <i>Attention, Perception, and Psychophysics</i> | 1                   | 100  | 2,168 | 0 |
| Bilingualism and performance on two widely used developmental neuropsychological test batteries                                                                                            |                                                 | Karlsson et al.     |      |       |   |
| 2015                                                                                                                                                                                       | <i>PLoS ONE</i>                                 | 4                   | 0    | 3,234 | 0 |
| Feature binding and the processing of global-local shapes in bilingual and monolingual children                                                                                            |                                                 | Cottini et al.      |      |       |   |
| 2015                                                                                                                                                                                       | <i>Memory and Cognition</i>                     | 2                   | 66,7 | 2,457 | 2 |
| The impact of late, non-balanced bilingualism on cognitive performance                                                                                                                     |                                                 | Vega-Mendoza et al. |      |       |   |
| 2015                                                                                                                                                                                       | <i>Cognition</i>                                | 2                   | 42,8 | 3,479 | 8 |
| Attention during visual search: The benefit of bilingualism                                                                                                                                |                                                 | Friesen et al.      |      |       |   |
| 2015                                                                                                                                                                                       | <i>International Journal of Bilingualism</i>    | 2                   | 50   | 0,697 | 1 |
| Back to Basics: A Bilingual Advantage in Infant Visual Habituation                                                                                                                         |                                                 | Singh et al.        |      |       |   |
| 2015                                                                                                                                                                                       | <i>Child Development</i>                        | 1                   | 100  | 4,061 | 5 |
| Balanced bilingualism and early age of second language acquisition as the underlying mechanisms of a bilingual executive control advantage: Why variations in bilingual experiences matter |                                                 | Yow & Li            |      |       |   |
| 2015                                                                                                                                                                                       | <i>Frontiers in Psychology</i>                  | 3                   |      | 2,56  | 7 |
| Bilingual children show an advantage in controlling verbal interference during spoken language comprehension                                                                               |                                                 | Filippi et al.      |      |       |   |
| 2015                                                                                                                                                                                       | <i>Bilingualism</i>                             | 1                   | 100  | 2,009 | 2 |
| Bilingualism and inhibitory control: Possible confounds with the variables "profession" and "level of education"                                                                           |                                                 | Rodrigues & Zimmer  |      |       |   |
| 2015                                                                                                                                                                                       | <i>Calidoscopio</i>                             | 4                   | 0    | 0     | 0 |

## List of publications (continue)

|                                                                                                                                |                                                                          |   |      |                        |   |
|--------------------------------------------------------------------------------------------------------------------------------|--------------------------------------------------------------------------|---|------|------------------------|---|
| Children's scientific reasoning in the context of bilingualism                                                                 |                                                                          |   |      | Kempert & Hardy        |   |
| 2015                                                                                                                           | <i>International Journal of Bilingualism</i>                             | 2 | 50   | 0,697                  | 0 |
| Cognitive control in bilingual children: Disentangling the effects of second-language proficiency and onset age of acquisition |                                                                          |   |      | Struys et al.          |   |
| 2015                                                                                                                           | <i>Swiss Journal of Psychology</i>                                       | 3 |      | 0,696                  | 1 |
| Executive control in fluent and lapsed bilinguals                                                                              |                                                                          |   |      | Bogulski et al.        |   |
| 2015                                                                                                                           | <i>Bilingualism</i>                                                      | 1 | 100  | 2,009                  | 0 |
| Interference control in elderly bilinguals: Appearances can be misleading                                                      |                                                                          |   |      | Ansaldo et al.         |   |
| 2015                                                                                                                           | <i>Journal of Clinical and Experimental Neuropsychology</i>              | 4 | 0    | 1,693                  | 3 |
| Linguistic stimulation impact on verbal working memory in the early stages of school education                                 |                                                                          |   |      | Pawlicka et al.        |   |
| 2015                                                                                                                           | <i>Acta Neuropsychologica</i>                                            | 2 | 50   | 0                      | 0 |
| Musical Training, Bilingualism, and Executive Function: A Closer Look at Task Switching and Dual-Task Performance              |                                                                          |   |      | Moradzadeh et al.      |   |
| 2015                                                                                                                           | <i>Cognitive Science</i>                                                 | 4 | 0    | 2,446                  | 0 |
| Proficiency and control in verbal fluency performance across the lifespan for monolinguals and bilinguals                      |                                                                          |   |      | Friesen et al.         |   |
| 2015                                                                                                                           | <i>Language, Cognition and Neuroscience</i>                              | 1 | 100  | 1,47                   | 2 |
| The bilingual advantage in phonetic learning                                                                                   |                                                                          |   |      | Antoniou et al.        |   |
| 2015                                                                                                                           | <i>Bilingualism</i>                                                      | 1 | 100  | 2,009                  | 1 |
| The bilingual advantage in the Stroop task: Simultaneous vs. early bilinguals                                                  |                                                                          |   |      | Sabourin & Vinerte     |   |
| 2015                                                                                                                           | <i>Bilingualism</i>                                                      | 3 |      | 2,009                  | 1 |
| The Bilingual Switching Advantage: Sometimes Related to Bilingual Proficiency, Sometimes Not                                   |                                                                          |   |      | Tao et al.             |   |
| 2015                                                                                                                           | <i>Journal of the International Neuropsychological Society</i>           | 2 | 33,3 | 2,963                  | 2 |
| The Development of Prosodic Features and their Contribution to Rhythm Production in Simultaneous Bilinguals                    |                                                                          |   |      | Schmidt & Post         |   |
| 2015                                                                                                                           | <i>Language and Speech</i>                                               | 1 | 100  | 1,04                   | 0 |
| The Exposure Advantage: Early Exposure to a Multilingual Environment Promotes Effective Communication                          |                                                                          |   |      | Fan et al.             |   |
| 2015                                                                                                                           | <i>Psychological Science</i>                                             | 1 | 100  | 4,94                   | 3 |
| The Joint Effect of Bilingualism and ADHD on Executive Functions                                                               |                                                                          |   |      | Mor et al.             |   |
| 2015                                                                                                                           | <i>Journal of Attention Disorders</i>                                    | 4 | 0    | 3,779                  | 3 |
| The role of executive functions in bilingual children with reading difficulties                                                |                                                                          |   |      | Jalali-Moghadam et al. |   |
| 2015                                                                                                                           | <i>Scandinavian Journal of Psychology</i>                                | 4 | 0    | 1,057                  | 0 |
| Verbal and nonverbal cognitive control in bilinguals and interpreters                                                          |                                                                          |   |      | Woumans et al.         |   |
| 2015                                                                                                                           | <i>Journal of Experimental Psychology: Learning Memory and Cognition</i> | 1 | 100  | 2,862                  | 2 |
| Working memory capacity: Is there a bilingual advantage?                                                                       |                                                                          |   |      | Ratiu & Azuma          |   |
| 2015                                                                                                                           | <i>Journal of Cognitive Psychology</i>                                   | 4 | 0    | 1,431                  | 1 |
| Early stage second-language learning improves executive control: Evidence from ERP                                             |                                                                          |   |      | Sullivan et al.        |   |
| 2014                                                                                                                           | <i>Brain and Language</i>                                                | 4 | 0    | 3,215                  | 8 |

## List of publications (continue)

|                                                                                                                                                             |                                                                          |   |      |                      |    |
|-------------------------------------------------------------------------------------------------------------------------------------------------------------|--------------------------------------------------------------------------|---|------|----------------------|----|
| Bilingualism trains specific brain circuits involved in flexible rule selection and application                                                             |                                                                          |   |      | Stocco & Prat        |    |
| 2014                                                                                                                                                        | <i>Brain and Language</i>                                                | 1 | 100  | 3,215                | 3  |
| Are bilingual advantages dependent upon specific tasks or specific bilingual experiences?                                                                   |                                                                          |   |      | Paap et al.          |    |
| 2014                                                                                                                                                        | <i>Journal of Cognitive Psychology</i>                                   | 4 | 0    | 1,431                | 21 |
| No evidence for reduced Simon cost in elderly bilinguals and bidialectals                                                                                   |                                                                          |   |      | Kirk et al.          |    |
| 2014                                                                                                                                                        | <i>Journal of Cognitive Psychology</i>                                   | 4 | 0    | 1,431                | 9  |
| Electrophysiological explorations of the bilingual advantage: Evidence from a Stroop task                                                                   |                                                                          |   |      | Coderre & Van Heuven |    |
| 2014                                                                                                                                                        | <i>PLoS ONE</i>                                                          | 1 | 100  | 3,234                | 3  |
| Executive function and bilingualism in young and older adults                                                                                               |                                                                          |   |      | Kousaie et al.       |    |
| 2014                                                                                                                                                        | <i>Frontiers in Behavioral Neuroscience</i>                              | 4 | 0    | 3,27                 | 5  |
| Inhibitory control in bilinguals and musicians: Event related potential (ERP) evidence for experience-specific effects                                      |                                                                          |   |      | Moreno et al.        |    |
| 2014                                                                                                                                                        | <i>PLoS ONE</i>                                                          | 4 | 0    | 3,234                | 11 |
| Cognitive advantages and disadvantages in early and late bilinguals                                                                                         |                                                                          |   |      | Pelham & Abrams      |    |
| 2014                                                                                                                                                        | <i>Journal of Experimental Psychology: Learning Memory and Cognition</i> | 1 | 100  | 2,862                | 18 |
| Are bilingual children better at ignoring perceptually misleading information? A novel test                                                                 |                                                                          |   |      | Goldman et al.       |    |
| 2014                                                                                                                                                        | <i>Developmental Science</i>                                             | 4 | 0    | 3,808                | 1  |
| Better early or late? Examining the influence of age of exposure and language proficiency on executive function in early and late bilinguals                |                                                                          |   |      | Kalia et al.         |    |
| 2014                                                                                                                                                        | <i>Journal of Cognitive Psychology</i>                                   | 4 | 0    | 1,431                | 2  |
| Bilingual advantages in executive functioning: Problems in convergent validity, discriminant validity, and the identification of the theoretical constructs |                                                                          |   |      | Paap & Sawi          |    |
| 2014                                                                                                                                                        | <i>Frontiers in Psychology</i>                                           | 4 | 0    | 2,56                 | 22 |
| Bilingual children show advantages in nonverbal auditory executive function task                                                                            |                                                                          |   |      | Foy & Mann           |    |
| 2014                                                                                                                                                        | <i>International Journal of Bilingualism</i>                             | 2 | 66,7 | 0,697                | 1  |
| Cognitive control in bilinguals: Advantages in Stimulus-Stimulus inhibition                                                                                 |                                                                          |   |      | Blumenfeld & Marian  |    |
| 2014                                                                                                                                                        | <i>Bilingualism</i>                                                      | 1 | 100  | 2,009                | 5  |
| Conflict resolution in sentence processing is the same for bilinguals and monolinguals: The role of confirmation bias in testing for bilingual advantages   |                                                                          |   |      | Paap & Liu           |    |
| 2014                                                                                                                                                        | <i>Journal of Neurolinguistics</i>                                       | 4 | 0    | 1,489                | 15 |
| Effects of bilingualism and aging on executive function and working memory                                                                                  |                                                                          |   |      | Bialystok et al.     |    |
| 2014                                                                                                                                                        | <i>Psychology and Aging</i>                                              | 1 | 100  | 2,646                | 10 |
| Effects of Bilingualism and Trilingualism in L2 Production: Evidence from Errors and Self-Repairs in Early Balanced Bilingual and Trilingual Adults         |                                                                          |   |      | Hsu                  |    |
| 2014                                                                                                                                                        | <i>Journal of Psycholinguistic Research</i>                              | 2 | 50   | 0,633                | 0  |
| Executive function predicts artificial language learning                                                                                                    |                                                                          |   |      | Kapa & Colombo       |    |
| 2014                                                                                                                                                        | <i>Journal of Memory and Language</i>                                    | 3 |      | 4,237                | 3  |

*List of publications (continue)*

|                                                                                                                                                                 |                                                                      |   |      |                        |    |
|-----------------------------------------------------------------------------------------------------------------------------------------------------------------|----------------------------------------------------------------------|---|------|------------------------|----|
| Specificity of the bilingual advantage for memory: Examining cued recall, generalization, and working memory in monolingual, bilingual, and trilingual toddlers |                                                                      |   |      | Brito et al.           |    |
| 2014                                                                                                                                                            | <i>Frontiers in Psychology</i>                                       | 2 | 25   | 2,56                   | 1  |
| Inhibitory processes in visual perception: A bilingual advantage                                                                                                |                                                                      |   |      | Wimmer & Marx          |    |
| 2014                                                                                                                                                            | <i>Journal of Experimental Child Psychology</i>                      | 1 | 100  | 2,549                  | 1  |
| Is there a bilingual advantage in the ANT task? Evidence from children                                                                                          |                                                                      |   |      | Antón et al.           |    |
| 2014                                                                                                                                                            | <i>Frontiers in Psychology</i>                                       | 4 | 0    | 2,56                   | 33 |
| Learning and processing of nonverbal symbolic information in bilinguals and monolinguals                                                                        |                                                                      |   |      | Blumenfeld & Adams     |    |
| 2014                                                                                                                                                            | <i>Frontiers in Psychology</i>                                       | 4 | 0    | 2,56                   | 0  |
| Maturation of executive functioning skills in early sequential bilingualism                                                                                     |                                                                      |   |      | Kalashnikova & Mattock |    |
| 2014                                                                                                                                                            | <i>International Journal of Bilingual Education and Bilingualism</i> | 2 | 33,3 | 1,027                  | 1  |
| Never too late? An advantage on tests of auditory attention extends to late bilinguals                                                                          |                                                                      |   |      | Bak et al.             |    |
| 2014                                                                                                                                                            | <i>Frontiers in Psychology</i>                                       | 2 | 50   | 2,56                   | 9  |
| Producing bilinguals through immersion education: Development of metalinguistic awareness                                                                       |                                                                      |   |      | Bialystok et al.       |    |
| 2014                                                                                                                                                            | <i>Applied Psycholinguistics</i>                                     | 2 | 50   | 1,512                  | 11 |
| Reassessing the bilingual advantage in theory of mind and its cognitive underpinnings                                                                           |                                                                      |   |      | Nguyen & Astington     |    |
| 2014                                                                                                                                                            | <i>Bilingualism</i>                                                  | 1 | 100  | 2,009                  | 4  |
| Second-language fluency predicts native language stroop effects: Evidence from spanish-english bilinguals                                                       |                                                                      |   |      | Suarez et al.          |    |
| 2014                                                                                                                                                            | <i>Journal of the International Neuropsychological Society</i>       | 3 |      | 2,963                  | 1  |
| Specific language impairment in language-minority children from low-income families                                                                             |                                                                      |   |      | Engel De Abreu et al.  |    |
| 2014                                                                                                                                                            | <i>International Journal of Language and Communication Disorders</i> | 1 | 100  | 1,471                  | 1  |
| Flexible memory retrieval in bilingual 6-month-old infants                                                                                                      |                                                                      |   |      | Brito & Barr           |    |
| 2014                                                                                                                                                            | <i>Developmental Psychobiology</i>                                   | 2 | 50   | 3,307                  | 7  |
| The benefits of being bilingual: Working memory in bilingual Turkish-Dutch children                                                                             |                                                                      |   |      | Blom et al.            |    |
| 2014                                                                                                                                                            | <i>Journal of Experimental Child Psychology</i>                      | 2 | 75   | 2,549                  | 9  |
| The effect of script similarity on executive control in bilinguals                                                                                              |                                                                      |   |      | Coderre & van Heuven   |    |
| 2014                                                                                                                                                            | <i>Frontiers in Psychology</i>                                       | 2 | 50   | 2,56                   | 6  |
| The impact of a third language on executive control processes                                                                                                   |                                                                      |   |      | Cedden & Simsek        |    |
| 2014                                                                                                                                                            | <i>International Journal of Bilingualism</i>                         | 3 |      | 0,697                  | 0  |
| The inhibitory advantage in bilingual children revisited: Myth or reality?                                                                                      |                                                                      |   |      | Duñabeitia et al.      |    |
| 2014                                                                                                                                                            | <i>Experimental Psychology</i>                                       | 4 | 0    | 2,076                  | 46 |
| The relationship between phonological awareness and executive attention in Chinese-English bilingual children                                                   |                                                                      |   |      | Yang et al.            |    |
| 2014                                                                                                                                                            | <i>Cognitive Development</i>                                         | 3 |      | 2,172                  | 1  |

*List of publications (continue)*

|                                                                                                                                                    |                                                    |   |      |                     |    |
|----------------------------------------------------------------------------------------------------------------------------------------------------|----------------------------------------------------|---|------|---------------------|----|
| What's Easier: Doing what you want, or being told what to do? Cued versus voluntary language and task switching                                    |                                                    |   |      | Gollan et al.       |    |
| 2014                                                                                                                                               | <i>Journal of Experimental Psychology: General</i> | 3 |      | 5,929               | 9  |
| When first language is not first: An functional magnetic resonance imaging investigation of the neural basis of diglossia in Arabic                |                                                    |   |      | Nevat et al.        |    |
| 2014                                                                                                                                               | <i>European Journal of Neuroscience</i>            | 3 |      | 3,181               | 0  |
| The impact of early bilingualism on controlling a language learned late: An ERP study                                                              |                                                    |   |      | Martin et al.       |    |
| 2013                                                                                                                                               | <i>Frontiers in Psychology</i>                     | 3 |      | 2,56                | 6  |
| Neurophysiological marker of inhibition distinguishes language groups on a non-linguistic executive function test                                  |                                                    |   |      | Fernandez et al.    |    |
| 2013                                                                                                                                               | <i>Brain and Cognition</i>                         | 4 | 0    | 2,477               | 6  |
| The bilingual L2 advantage in recognition memory                                                                                                   |                                                    |   |      | Francis & Strobach  |    |
| 2013                                                                                                                                               | <i>Psychonomic Bulletin and Review</i>             | 1 | 100  | 3,369               | 0  |
| ERP-pupil size correlations reveal how bilingualism enhances cognitive flexibility                                                                 |                                                    |   |      | Kuipers & Thierry   |    |
| 2013                                                                                                                                               | <i>Cortex</i>                                      | 3 |      | 5,128               | 9  |
| Interference suppression vs. response inhibition: An explanation for the absence of a bilingual advantage in preschoolers' Stroop task performance |                                                    |   |      | Esposito et al.     |    |
| 2013                                                                                                                                               | <i>Cognitive Development</i>                       | 2 | 50   | 2,172               | 5  |
| Where is the bilingual advantage in task-switching?                                                                                                |                                                    |   |      | Hernández et al.    |    |
| 2013                                                                                                                                               | <i>Journal of Memory and Language</i>              | 2 | 66,7 | 4,237               | 37 |
| A Longitudinal Study of Memory Advantages in Bilinguals                                                                                            |                                                    |   |      | Ljungberg et al.    |    |
| 2013                                                                                                                                               | <i>PLoS ONE</i>                                    | 1 | 80   | 3,234               | 10 |
| The effect of dialect experience on Chinese children's Mandarin phonological awareness                                                             |                                                    |   |      | Chen et al.         |    |
| 2013                                                                                                                                               | <i>Reading and Writing</i>                         | 4 | 20   | 1,634               | 0  |
| Bilingualism interacts with domain in a working memory task: Evidence from aging                                                                   |                                                    |   |      | Luo et al.          |    |
| 2013                                                                                                                                               | <i>Psychology and Aging</i>                        | 2 | 50   | 2,646               | 16 |
| Parallel language activation and cognitive control during spoken word recognition in bilinguals                                                    |                                                    |   |      | Blumenfeld & Marian |    |
| 2013                                                                                                                                               | <i>Journal of Cognitive Psychology</i>             | 3 |      | 1,431               | 18 |
| Tracing the bilingual advantage in cognitive control: The role of flexibility in temporal preparation and category switching                       |                                                    |   |      | Marzecová et al.    |    |
| 2013                                                                                                                                               | <i>Journal of Cognitive Psychology</i>             | 1 | 80   | 1,431               | 9  |
| Dual mechanisms of cognitive control in bilinguals and monolinguals                                                                                |                                                    |   |      | Morales et al.      |    |
| 2013                                                                                                                                               | <i>Journal of Cognitive Psychology</i>             | 1 | 100  | 1,431               | 16 |
| Attentional control in early and later bilingual children                                                                                          |                                                    |   |      | Kapa & Colombo      |    |
| 2013                                                                                                                                               | <i>Cognitive Development</i>                       | 2 | 50   | 2,172               | 12 |
| Cognitive advantage in children enrolled in a second-language immersion elementary school program for three years                                  |                                                    |   |      | Nicolay & Poncelet  |    |
| 2013                                                                                                                                               | <i>Bilingualism</i>                                | 1 | 80   | 2,009               | 6  |
| The effects of bilingualism on efficiency and lateralization of attentional networks                                                               |                                                    |   |      | Marzecová et al.    |    |
| 2013                                                                                                                                               | <i>Bilingualism</i>                                | 1 | 80   | 2,009               | 11 |

*List of publications (continue)*

|                                                                                                                                                              |                                                                             |   |     |                          |     |
|--------------------------------------------------------------------------------------------------------------------------------------------------------------|-----------------------------------------------------------------------------|---|-----|--------------------------|-----|
| The representation and processing of identical cognates by late bilinguals: RT and ERP effects                                                               |                                                                             |   |     | Peeters et al.           |     |
| 2013                                                                                                                                                         | <i>Journal of Memory and Language</i>                                       | 3 |     | 4,237                    | 17  |
| The timing and magnitude of Stroop interference and facilitation in monolinguals and bilinguals                                                              |                                                                             |   |     | Coderre et al.           |     |
| 2013                                                                                                                                                         | <i>Bilingualism</i>                                                         | 2 | 50  | 2,009                    | 11  |
| There is no coherent evidence for a bilingual advantage in executive processing                                                                              |                                                                             |   |     | Paap & Greenberg         |     |
| 2013                                                                                                                                                         | <i>Cognitive Psychology</i>                                                 | 4 | 0   | 5,064                    | 127 |
| Working memory development in monolingual and bilingual children.                                                                                            |                                                                             |   |     | Morales et al.           |     |
| 2013                                                                                                                                                         | <i>Journal of Experimental Child Psychology</i>                             | 1 | 100 | 2,549                    | 38  |
| Lifelong bilingualism maintains neural efficiency for cognitive control in aging                                                                             |                                                                             |   |     | Gold et al.              |     |
| 2013                                                                                                                                                         | <i>Journal of Neuroscience</i>                                              | 1 | 100 | 6,344                    | 82  |
| Perspective-taking ability in bilingual children: Extending advantages in executive control to spatial reasoning                                             |                                                                             |   |     | Greenberg et al.         |     |
| 2013                                                                                                                                                         | <i>Cognitive Development</i>                                                | 2 | 50  | 2,172                    | 16  |
| Executive functions and inhibitory control in multilingual children: Evidence from second-language learners, bilinguals, and trilinguals                     |                                                                             |   |     | Poarch & van Hell        |     |
| 2012                                                                                                                                                         | <i>Journal of Experimental Child Psychology</i>                             | 1 | 100 | 2,549                    | 19  |
| Influence of bilingualism on memory generalization during infancy                                                                                            |                                                                             |   |     | Brito & Barr             |     |
| 2012                                                                                                                                                         | <i>Developmental Science</i>                                                | 1 | 100 | 3,808                    | 18  |
| A bilingual advantage in controlling language interference during sentence comprehension                                                                     |                                                                             |   |     | Filippi et al.           |     |
| 2012                                                                                                                                                         | <i>Bilingualism</i>                                                         | 1 | 100 | 2,009                    | 7   |
| Concreteness effects in bilingual and monolingual word learning                                                                                              |                                                                             |   |     | Kaushanskaya & Rehtzigel |     |
| 2012                                                                                                                                                         | <i>Psychonomic Bulletin and Review</i>                                      | 3 |     | 3,369                    | 8   |
| Too much of a good thing: Stronger bilingual inhibition leads to larger lag-2 task repetition costs                                                          |                                                                             |   |     | Prior                    |     |
| 2012                                                                                                                                                         | <i>Cognition</i>                                                            | 2 | 50  | 3,479                    | 9   |
| Bilingual recognition memory: Stronger performance but weaker levels-of-processing effects in the less fluent language                                       |                                                                             |   |     | Francis & Gutiérrez      |     |
| 2012                                                                                                                                                         | <i>Memory and Cognition</i>                                                 | 3 |     | 2,457                    | 1   |
| A bilingual advantage for episodic memory in older adults                                                                                                    |                                                                             |   |     | Schroeder & Marian       |     |
| 2012                                                                                                                                                         | <i>Journal of Cognitive Psychology</i>                                      | 1 | 100 | 0,756                    | 17  |
| On the time course of exogenous cueing effects in bilinguals: Higher proficiency in a second language is associated with more rapid endogenous disengagement |                                                                             |   |     | Mishra et al.            |     |
| 2012                                                                                                                                                         | <i>Quarterly Journal of Experimental Psychology</i>                         | 3 |     | 2,127                    | 9   |
| Cognitive mechanisms of word learning in bilingual and monolingual adults: The role of phonological memory                                                   |                                                                             |   |     | Kaushanskaya             |     |
| 2012                                                                                                                                                         | <i>Bilingualism</i>                                                         | 1 | 100 | 2,009                    | 5   |
| Subcortical encoding of sound is enhanced in bilinguals and relates to executive function advantages                                                         |                                                                             |   |     | Krizman et al.           |     |
| 2012                                                                                                                                                         | <i>Proceedings of the National Academy of Sciences of the United States</i> | 1 | 100 | 9,674                    | 62  |

## List of publications (continue)

|                                                                                                                                                                    |                                                                             |   |      |                              |    |
|--------------------------------------------------------------------------------------------------------------------------------------------------------------------|-----------------------------------------------------------------------------|---|------|------------------------------|----|
| Where, when and why brain activation differs for bilinguals and monolinguals during picture naming and reading aloud                                               |                                                                             |   |      | Jones et al.                 |    |
| 2012                                                                                                                                                               | <i>Cerebral Cortex</i>                                                      | 3 |      | 8,665                        | 48 |
| The effect of bilingualism on letter and category fluency tasks in primary school children: Advantage or disadvantage?                                             |                                                                             |   |      | Kormi-Nouri et al.           |    |
| 2012                                                                                                                                                               | <i>Bilingualism</i>                                                         | 2 | 50   | 2,009                        | 3  |
| Conflict monitoring and resolution: Are two languages better than one? Evidence from reaction time and event-related brain potentials                              |                                                                             |   |      | Kousaie & Phillips           |    |
| 2012                                                                                                                                                               | <i>Brain Research</i>                                                       | 4 | 0    | 2,843                        | 33 |
| Effects of Marathi-Hindi bilingualism on neuropsychological performance                                                                                            |                                                                             |   |      | Kamat et al.                 |    |
| 2012                                                                                                                                                               | <i>Journal of the International Neuropsychological Society</i>              | 3 |      | 2,963                        | 3  |
| Ageing and bilingualism: Absence of a "bilingual advantage" in Stroop interference in a nonimmigrant sample                                                        |                                                                             |   |      | Kousaie & Phillips           |    |
| 2012                                                                                                                                                               | <i>Quarterly Journal of Experimental Psychology</i>                         | 2 | 33,3 | 2,127                        | 37 |
| Effects of early bilingualism on deductive reasoning in elementary school age [Effekte von früher Zweisprachigkeit auf das deduktive Schließen im Grundschulalter] |                                                                             |   |      | Kempert & Hardy              |    |
| 2012                                                                                                                                                               | <i>Zeitschrift für Entwicklungspsychologie und Pädagogische Psychologie</i> | 2 | 33,3 | 0,71                         | 0  |
| A Bilingual Advantage in Visual Language Discrimination in Infancy                                                                                                 |                                                                             |   |      | Sebastián-Gallés et al.      |    |
| 2012                                                                                                                                                               | <i>Psychological Science</i>                                                | 1 | 100  | 4,94                         | 39 |
| Bilingualism Enriches the Poor: Enhanced Cognitive Control in Low-Income Minority Children                                                                         |                                                                             |   |      | Engel de Abreu et al.        |    |
| 2012                                                                                                                                                               | <i>Psychological Science</i>                                                | 2 | 50   | 4,94                         | 47 |
| Emerging bilingualism: Dissociating advantages for metalinguistic awareness and executive control                                                                  |                                                                             |   |      | Bialystok & Barac            |    |
| 2012                                                                                                                                                               | <i>Cognition</i>                                                            | 3 |      | 3,479                        | 49 |
| Reasoning about other people's beliefs: Bilinguals have an advantage                                                                                               |                                                                             |   |      | Rubio-Fernández & Glucksberg |    |
| 2011                                                                                                                                                               | <i>Frontiers in Psychology</i>                                              | 1 | 100  | 2,862                        | 16 |
| Inhibition and adjective learning in bilingual and monolingual children                                                                                            |                                                                             |   |      | Yoshida et al.               |    |
| 2011                                                                                                                                                               | <i>Frontiers in Psychology</i>                                              | 1 | 100  | 2,56                         | 13 |
| Is there a relationship between language switching and executive functions in bilingualism? Introducing a withingroup analysis approach                            |                                                                             |   |      | Soveri et al.                |    |
| 2011                                                                                                                                                               | <i>Frontiers in Psychology</i>                                              | 3 |      | 2,56                         | 36 |
| The efficiency of attentional networks in early and late bilinguals: The role of age of acquisition                                                                |                                                                             |   |      | Tao et al.                   |    |
| 2011                                                                                                                                                               | <i>Frontiers in Psychology</i>                                              | 1 | 100  | 2,56                         | 51 |
| When the tail counts: The advantage of bilingualism through the ex-Gaussian distribution analysis                                                                  |                                                                             |   |      | Calabria et al.              |    |
| 2011                                                                                                                                                               | <i>Frontiers in Psychology</i>                                              | 1 | 100  | 2,56                         | 4  |
| Cognitive benefits and costs of bilingualism in elementary school students: The case of mathematical word problems                                                 |                                                                             |   |      | Kempert et al.               |    |
| 2011                                                                                                                                                               | <i>Journal of Educational Psychology</i>                                    | 4 | 0    | 3,518                        | 19 |

*List of publications (continue)*

|                                                                                                                                                                    |                                                                      |   |      |                            |    |
|--------------------------------------------------------------------------------------------------------------------------------------------------------------------|----------------------------------------------------------------------|---|------|----------------------------|----|
| Bilingual advantage in attentional control: Evidence from the forced-attention dichotic listening paradigm                                                         |                                                                      |   |      | Soveri et al.              |    |
| 2011                                                                                                                                                               | <i>Bilingualism</i>                                                  | 1 | 100  | 2,009                      | 19 |
| Early childhood bilingualism leads to advances in executive attention: Dissociating culture and language                                                           |                                                                      |   |      | Yang et al.                |    |
| 2011                                                                                                                                                               | <i>Bilingualism</i>                                                  | 1 | 100  | 2,009                      | 40 |
| Good language-switchers are good task-switchers: Evidence from Spanish-English and Mandarin-English bilinguals                                                     |                                                                      |   |      | Prior & Gollan             |    |
| 2011                                                                                                                                                               | <i>Journal of the International Neuropsychological Society</i>       | 2 | 50   | 2,963                      | 83 |
| Errors on the WCST correlate with language proficiency scores in Spanish-English bilingual children                                                                |                                                                      |   |      | Vega & Fernandez           |    |
| 2011                                                                                                                                                               | <i>Archives of Clinical Neuropsychology</i>                          | 3 |      | 1,986                      | 7  |
| Speed of processing, anticipation, inhibition and working memory in bilinguals                                                                                     |                                                                      |   |      | Bonifacci et al.           |    |
| 2011                                                                                                                                                               | <i>Developmental Science</i>                                         | 4 | 16,7 | 3,808                      | 14 |
| The effect of bilingualism and age on inhibitory control                                                                                                           |                                                                      |   |      | Lee Salvatierra & Rosselli |    |
| 2011                                                                                                                                                               | <i>International Journal of Bilingualism</i>                         | 2 | 50   | 0,697                      | 25 |
| The effects of bilingualism on toddlers' executive functioning                                                                                                     |                                                                      |   |      | Poulin-Dubois et al.       |    |
| 2011                                                                                                                                                               | <i>Journal of Experimental Child Psychology</i>                      | 4 | 20   | 2,549                      | 54 |
| Bilingualism and enhanced attention in early adulthood                                                                                                             |                                                                      |   |      | Stafford                   |    |
| 2011                                                                                                                                                               | <i>International Journal of Bilingual Education and Bilingualism</i> | 3 |      | 1,027                      | 3  |
| Cross-language intrusion errors in aging bilinguals reveal the link between executive control and language selection                                               |                                                                      |   |      | Gollan et al.              |    |
| 2011                                                                                                                                                               | <i>Psychological Science</i>                                         | 3 |      | 4,94                       | 33 |
| Bridging language and attention: Brain basis of the impact of bilingualism on cognitive control                                                                    |                                                                      |   |      | Garbin et al.              |    |
| 2010                                                                                                                                                               | <i>NeuroImage</i>                                                    | 1 | 100  | 6,357                      | 97 |
| Conflict resolution in sentence processing by bilinguals                                                                                                           |                                                                      |   |      | Moreno et al.              |    |
| 2010                                                                                                                                                               | <i>Journal of Neurolinguistics</i>                                   | 4 | 0    | 1,742                      | 23 |
| Word mapping and executive functioning in young monolingual and bilingual children                                                                                 |                                                                      |   |      | Bialystok et al.           |    |
| 2010                                                                                                                                                               | <i>Journal of Cognition and Development</i>                          | 2 | 50   | 1,683                      | 47 |
| Cognitive effects of bilingualism: Digging deeper for the contributions of language dominance, linguistic knowledge, socio-economic status and cognitive abilities |                                                                      |   |      | Mueller Gathercole et al.  |    |
| 2010                                                                                                                                                               | <i>International Journal of Bilingual Education and Bilingualism</i> | 2 | 50   | 1,027                      | 18 |
| Does bilingualism help memory? Competing effects of verbal ability and executive control                                                                           |                                                                      |   |      | Wodniecka et al.           |    |
| 2010                                                                                                                                                               | <i>International Journal of Bilingual Education and Bilingualism</i> | 2 | 75   | 1,027                      | 18 |
| Advantages of bilinguals over monolinguals in learning a third language                                                                                            |                                                                      |   |      | Abu-Rabia & Sanitsky       |    |
| 2010                                                                                                                                                               | <i>Bilingual Research Journal</i>                                    | 1 | 100  | 0                          | 7  |
| Bilingual verbal and nonverbal creative behavior                                                                                                                   |                                                                      |   |      | Kharkhurin                 |    |
| 2010                                                                                                                                                               | <i>International Journal of Bilingualism</i>                         | 2 | 50   | 0,697                      | 18 |



## List of publications (continue)

|                                                                                                                                 |                                                          |   |      |                         |     |
|---------------------------------------------------------------------------------------------------------------------------------|----------------------------------------------------------|---|------|-------------------------|-----|
| A bilingual advantage in task switching                                                                                         |                                                          |   |      | Prior & Macwhinney      |     |
| 2010                                                                                                                            | <i>Bilingualism</i>                                      | 2 | 50   | 2,009                   | 127 |
| Individual differences in control of language interference in late bilinguals are mainly related to general executive abilities |                                                          |   |      | Festman et al.          |     |
| 2010                                                                                                                            | <i>Behavioral and Brain Functions</i>                    | 3 |      | 1,972                   | 54  |
| Global-Local and Trail-Making Tasks by Monolingual and Bilingual Children: Beyond Inhibition                                    |                                                          |   |      | Bialystok               |     |
| 2010                                                                                                                            | <i>Developmental Psychology</i>                          | 2 | 50   | 4,141                   | 87  |
| On the bilingual advantage in conflict processing: Now you see it, now you don't                                                |                                                          |   |      | Costa et al.            |     |
| 2009                                                                                                                            | <i>Cognition</i>                                         | 2 | 50   | 3,479                   | 167 |
| Components of executive control with advantages for bilingual children in two cultures                                          |                                                          |   |      | Bialystok & Viswanathan |     |
| 2009                                                                                                                            | <i>Cognition</i>                                         | 2 | 50   | 3,479                   | 89  |
| Spatial negative priming in bilingualism                                                                                        |                                                          |   |      | Treccani et al.         |     |
| 2009                                                                                                                            | <i>Psychonomic Bulletin and Review</i>                   | 1 | 100  | 3,369                   | 28  |
| Bilingualism and conversational understanding in young children                                                                 |                                                          |   |      | Siegal et al.           |     |
| 2009                                                                                                                            | <i>Cognition</i>                                         | 1 | 100  | 3,479                   | 32  |
| Early bilingualism enhances mechanisms of false-belief reasoning                                                                |                                                          |   |      | Kovács                  |     |
| 2009                                                                                                                            | <i>Developmental Science</i>                             | 2 | 66,7 | 3,808                   | 67  |
| The source of enhanced cognitive control in bilinguals: Evidence from bimodal bilinguals                                        |                                                          |   |      | Emmorey et al.          |     |
| 2008                                                                                                                            | <i>Psychological Science</i>                             | 2 | 50   | 4,812                   | 80  |
| The effect of childhood bilingualism on episodic and semantic memory tasks: Cognition and Neurosciences                         |                                                          |   |      | Kormi-Nouri et al.      |     |
| 2008                                                                                                                            | <i>Scandinavian Journal of Psychology</i>                | 1 | 100  | 1,057                   | 9   |
| Paper: Bilingual experience and executive functioning in young children                                                         |                                                          |   |      | Carlson & Meltzoff      |     |
| 2008                                                                                                                            | <i>Developmental Science</i>                             | 2 | 33,3 | 3,808                   | 263 |
| The development of two types of inhibitory control in monolingual and bilingual children                                        |                                                          |   |      | Martin-Rhee & Bialystok |     |
| 2008                                                                                                                            | <i>Bilingualism</i>                                      | 2 | 50   | 2,009                   | 162 |
| What did Simon say? Revisiting the bilingual advantage                                                                          |                                                          |   |      | Morton & Harper         |     |
| 2007                                                                                                                            | <i>Developmental Science</i>                             | 4 | 0    | 3,808                   | 106 |
| Australian Vietnamese students learning mathematics: High ability bilinguals and their use of their languages                   |                                                          |   |      | Clarkson                |     |
| 2007                                                                                                                            | <i>Educational Studies in Mathematics</i>                | 3 |      | 0,579                   | 25  |
| Lexical-semantic organization in bilingual children: Evidence from a repeated word association task                             |                                                          |   |      | Sheng et al.            |     |
| 2006                                                                                                                            | <i>Journal of Speech, Language, and Hearing Research</i> | 2 | 66,7 | 2,07                    | 34  |
| Effect of bilingualism on cognitive control in the Simon task: Evidence from MEG                                                |                                                          |   |      | Bialystok et al.        |     |
| 2005                                                                                                                            | <i>NeuroImage</i>                                        | 2 | 50   | 6,357                   | 160 |
